# Supplementary material for: Two-dimensional MoS2 nanosheets as a capillary GC stationary phase for highly effective molecular screening
Source: Royal Society of Chemistry journal article supplement (doi:10.1039/c4an00332b), 2014-01-01
Supplement: c4an00332b1.pdf [file c4an00332b1.pdf]

## Electronic Supplementary Information (ESI)

### 1. Reagents and Chemicals

Bulk MoS<sub>2</sub> powder (1-2 μm) was purchased from Aladdin Chemicals (Shanghai, China). Poly(dimethylsiloxane) was purchased from J&K Scientific Ltd. (Guangzhou, China). Fused-silica capillary was purchased from Yongnian Optic Fiber Factory (Hebei, China). All of the tested chemicals are of GC grade and purchased from Aladdin Chemicals (Shanghai, China). All water used in this work was 18 MΩ-cm deionized water (DIW) produced with a water purification system (PCWJ-10, Pure Technology Co. Ltd., Chengdu, China). All standards and stock solutions were stored at 4 °C in the dark until use.

### 2. Instrumentation

An Agilent (Santa Clara, USA) GC-7820A system with a capillary control unit, a split injection port, and a flame ionization detector was used for all GC separations. Highly pure N<sub>2</sub> gas (99.999%) was used as the carrier gas with a linear velocity of 10-25 cm/s. The injection split ratio was 200:1. The instrument control and data acquisition were carried out with a ChemStation software (Agilent, USA). The SEM images were obtained from a JEOL JSM-7500F scanning electron microscope (Akishima, Japan) at 30.0 kV. The transmission electron microscopy images were obtained from a FEI Tecnai G2 F20 S-TWIN transmission electron microscope (Oregon, USA). The atomic force microscopy images were obtained from a SPA-400 model atomic force microscope (Kyoto, Japan).

### 3. Preparation of MoS<sub>2</sub>/PDMS-modified open tubular columns

Fused-silica capillary was at first filled with 1 M NaOH and kept for 1 h. The capillary was then washed with ultrapure water for 1 h, followed by rinsing with a flow of 0.1 M HCl for 2 h, until the pH of the outflow was around 7. The obtained capillary was then purged with N<sub>2</sub> flow at 150 °C for 5 h.

The MoS<sub>2</sub>-coated column was prepared by a dynamic coating method similar to previously reported<sup>[1]</sup>. 0.1 mL suspension of MoS<sub>2</sub> nanosheet was introduced into the modified capillary mentioned above, and then pushed all through the capillary with a rate of 0.6 cm/s in order to coat a wet layer on the inner wall of the capillary. During the coating process, a 2-m long buffering tube was connected to the outlet end of the capillary column to avoid sudden flow change of the introduced suspension. Subsequently, the coated open tubular column was blown with N<sub>2</sub> for 1 h and then kept under an increased temperature (30 °C-300°C, 2 °C/min) and a thereafter steady temperature (300°C, 6 h) for conditioning prior to use. PDMS-column was prepared with the same procedure using 4.7% w.t.% PDMS in CH<sub>2</sub>Cl<sub>2</sub>.

### 4. Calculation of thermodynamics

The adsorption enthalpies were calculated based on the van't Hoff equation<sup>[2]</sup>:

$$\ln k' = -\frac{\Delta H}{RT} + \frac{\Delta S}{R} + \ln \Phi$$

$k'$  stands for retention factor, calculated by equation:

$$k' = \frac{t - t_0}{t_0}$$

$t$  stands for retention time and  $t_0$  stands for dead time, measured by butane as model molecule.

$R$  stands for gas constant equal to 8.314 J/(mol•K)

$T$  stands for thermodynamic temperature

$\Phi$  stands for compare, calculated by equation:

$$\Phi = \frac{V_{COL} - t_0 v}{t_0 v}$$

$V_{COL}$  stands for the physical volume of column and  $v$  stands for the speed of carry gas.

The slope was obtained from the van't Hoff plots and the Gibbs free energies were calculated from the equation:

$$\Delta G = \Delta H - T\Delta S$$

## 5. Figures and tables

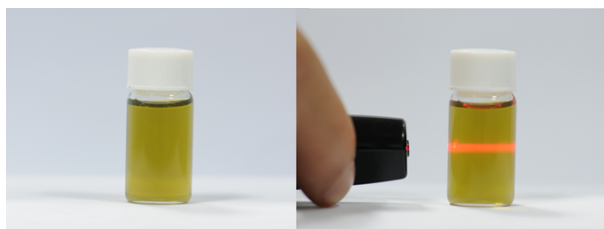

**Fig.S1** Left: the suspension of layered MoS<sub>2</sub> nanosheets dispersed in a mixture of water and ethanol. Right: Tyndall effect observed from the MoS<sub>2</sub> suspension.

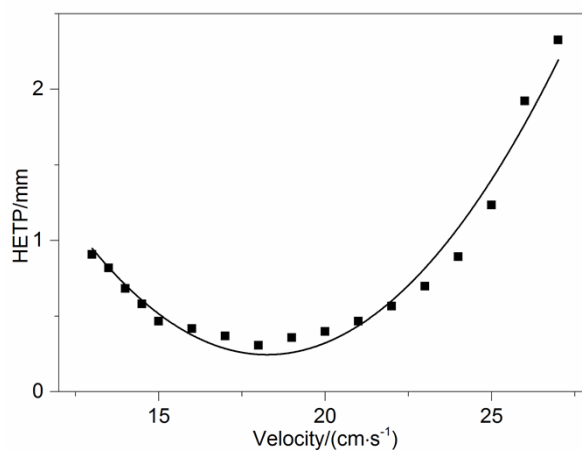

**Fig. S2** Van Deemter plot of dodecane at 120 °C ( $H_{\min}$ : 0.31 mm at 18.0 cm/s).

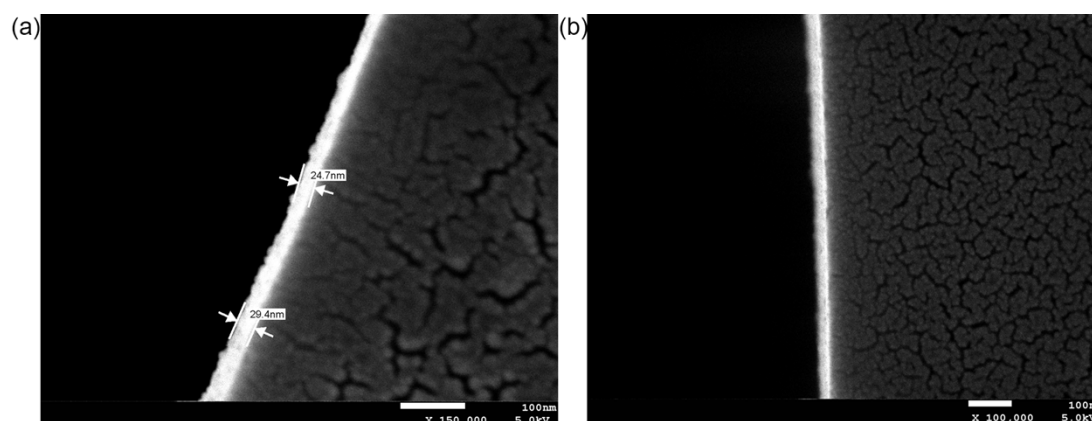

**Fig. S3** SEM images of cross section of capillary open tubular column coated with MoS<sub>2</sub> nanosheets.

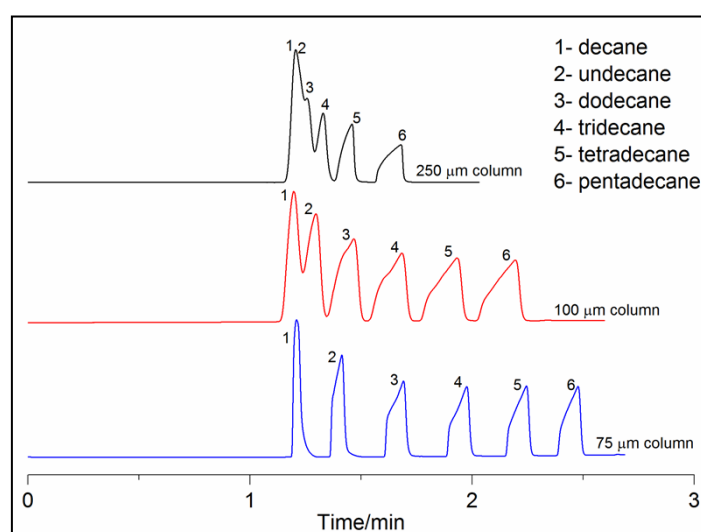

**Fig. S4** Chromatogram of alkane mixture obtained from MoS<sub>2</sub>-coated column with different inner diameters in the same separation conditions.

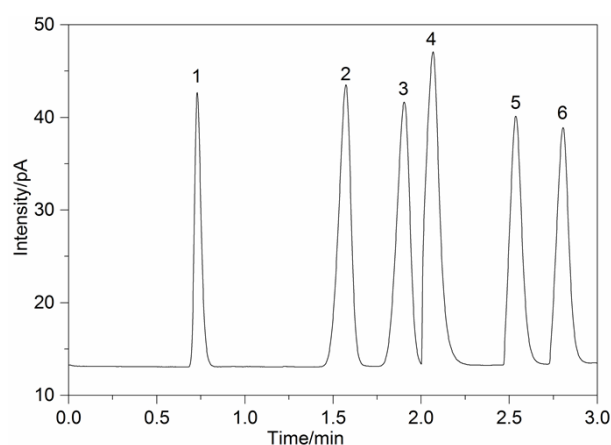

**Fig. S5** Chromatogram of Grob's test mixture obtained from MoS<sub>2</sub>-coated column: 1. Carbon dichloride; 2. Decane; 3. Undecane; 4. 2,6-dimethylaniline; 5. Methyl undecanoate; 6. Methyl dodecanoate. Temperature program: 60 °C for 0.5 min, then 45 °C/min from 60 °C to 180 °C, and at 180 °C until end.

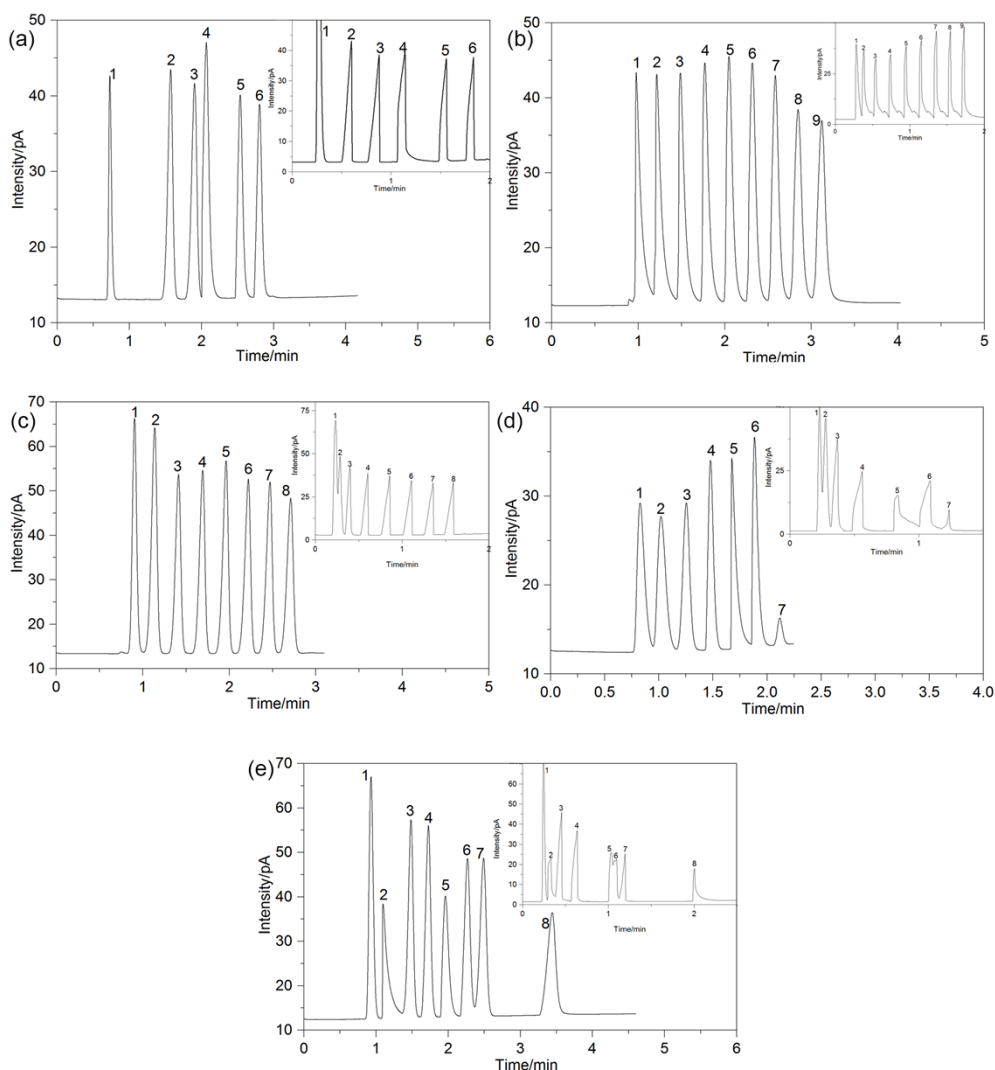

**Fig. S6** Chromatogram obtained in the same separation conditions from MoS<sub>2</sub>-coated column and PDMS-coated column (inset): (a) 1. Carbon dichloride; 2. Decane; 3. Undecane; 4. 2,6-dimethylaniline; 5. Methyl undecanoate; 6. Methyl dodecanoate. (b) 1. Butanol; 2. Pentanol; 3. Hexanol; 4. Heptanol; 5. Octanol; 6. Nonanol; 7. Decanol; 8. Undecanol; 9. Dodecanol. (c) 1. Octane; 2. Nonane; 3. Decane; 4. Undecane; 5. Dodecane; 6. Tridecane; 7. Tetradecane; 8. Pentadecane. (d) 1. Benzene; 2. Toluene; 3. Chlorobenzene; 4. Anisole; 5. Aniline; 6. Acetophenone; 7. Naphthalene. (e) 1. benzene; 2. Butanol; 3. Chlorobenzene; 4. Anisole; 5. Phenol; 6. Methyl benzoate; 7. Naphthalene; 8. 2-naphthol.

**Table S1**Chromatographic data of the MoS<sub>2</sub>-coated column obtained from the tested molecules

|                     | Boiling point (°C) | Retention factor (k) | N (plates/m) |
|---------------------|--------------------|----------------------|--------------|
| butanol             | 117.4              | 2.42                 | 1650         |
| pentanol            | 137.3              | 3.25                 | 2260         |
| hexanol             | 157                | 4.21                 | 2900         |
| heptanol            | 175.8              | 5.19                 | 3540         |
| octanol             | 196                | 6.17                 | 4010         |
| nonanol             | 214                | 7.12                 | 4650         |
| decanol             | 232.9              | 8.05                 | 5260         |
| undecanol           | 241                | 8.97                 | 5150         |
| dodecanol           | 255                | 9.93                 | 5780         |
| octane              | 125.8              | 2.17                 | 1480         |
| nonane              | 150.8              | 2.99                 | 1440         |
| decane              | 174.1              | 3.95                 | 2330         |
| undecane            | 196                | 4.92                 | 3290         |
| dodecane            | 216.2              | 5.87                 | 4290         |
| tridecane           | 234                | 6.77                 | 5160         |
| tetradecane         | 253.5              | 7.65                 | 6010         |
| pentadecane         | 268                | 8.48                 | 6230         |
| 2,6-dimethylaniline | 214                | 6.24                 | 3070         |
| methyl undecanoate  | 247                | 7.88                 | 6340         |
| methyl dodecanoate  | 262                | 8.82                 | 7640         |
| benzene             | 80.1               | 1.99                 | 1450         |
| toluene             | 110.6              | 2.83                 | 900          |
| chlorobenzene       | 131.7              | 3.97                 | 1380         |
| anisole             | 153.8              | 4.99                 | 2190         |
| aniline             | 184                | 5.86                 | 2560         |
| acetophenone        | 202                | 6.85                 | 3230         |
| naphthalene         | 218                | 7.94                 | 4010         |

**Table S2**McReynolds constants obtained from MoS<sub>2</sub>-coated column and PDMS-coated column at 120 °C<sup>[a]</sup>

| Phase                       | McReynolds constant values |    |      |      |      | $\Delta I$ |
|-----------------------------|----------------------------|----|------|------|------|------------|
|                             | x'                         | y' | z'   | u'   | s'   |            |
| MoS <sub>2</sub> nanosheets | 49.8                       | 11 | 94.3 | 76.3 | 64.1 | 79.2       |
| 1                           |                            |    |      |      |      |            |
| DB-1                        | 16                         | 55 | 44   | 65   | 42   | 44         |

[a]: x': benzene; y': 1-butanol; z': 2-pentanone; u': nitropropane; s': pyridine

**Reference**

- <sup>1</sup>. Z.-Y. Gu and X.-P. Yan, *Angew. Chem. Int. Ed.* **49** (2010) 1477.
- <sup>2</sup>. M. Karwa and S. Mitra, *Anal. Chem.* **78** (2006) 2064.
